# Supplementary material
Source: PubMed Central journal article supplement (PMC8908332)
Supplement: NIHMS1771367-supplement-2.pdf [file NIHMS1771367-supplement-2.pdf]

## ASSOCIATED CONTENT

### ● Supporting Information

The Supporting Information is available free of charge at <https://pubs.acs.org/doi/10.1021/acs.jproteome.0c00024>.

Hematoxylin and eosin stain of prostate cancer tissue, multiple tissue types treated with Endo F3, mixture of PNGase F and Endo F3, survival probability of noncore-fucosylated N-linked glycans, full SDS-PAGE gel image, master list of N-linked glycans with PNGase F, and master list of N-linked glycans with Endo F3 ([PDF](#))
