# Supplementary material
Source: PubMed Central journal article supplement (PMC8908332)
Supplement: NIHMS1771367-supplement-All_supplementary_Figures_and_Tables.pdf [file NIHMS1771367-supplement-All_supplementary_Figures_and_Tables.pdf]

## **Supporting Information:**

### **A New Enzymatic Approach to Distinguish Fucosylation Isomers of N-linked Glycans in Tissues Using MALDI Imaging Mass Spectrometry**

Connor A. West<sup>1</sup>, Hongyan Liang<sup>1</sup>, Richard R. Drake<sup>1</sup>, Anand S. Mehta\*<sup>1</sup>

1) Medical University of South Carolina, Department of Cell and Molecular Pharmacology and Experimental Therapeutics, 173 Ashley Avenue, Basic Science Building 358, Charleston SC, USA 29425

\*To whom correspondence should be addressed.

Email: [mehtaa@musc.edu](mailto:mehtaa@musc.edu); Phone: 843-792-9946

Supplementary Figure 1: Hematoxylin and Eosin Stain of Prostate Cancer Tissue

Supplementary Figure 2: Multiple Tissue Types Treated with Endo F3

Supplementary Figure 3: Mixture of PNGase F and Endo F3

Supplementary Figure 4: Survival Probability for Non-Core Fucosylated N-Linked Glycan

Supplementary Figure 5: Full SDS-PAGE Gel Image from Figure 1

Supplementary Table 1: Master List of N-Linked Glycans with PNGase F

Supplementary Table 2: Master List of N-Linked Glycans with Endo F3

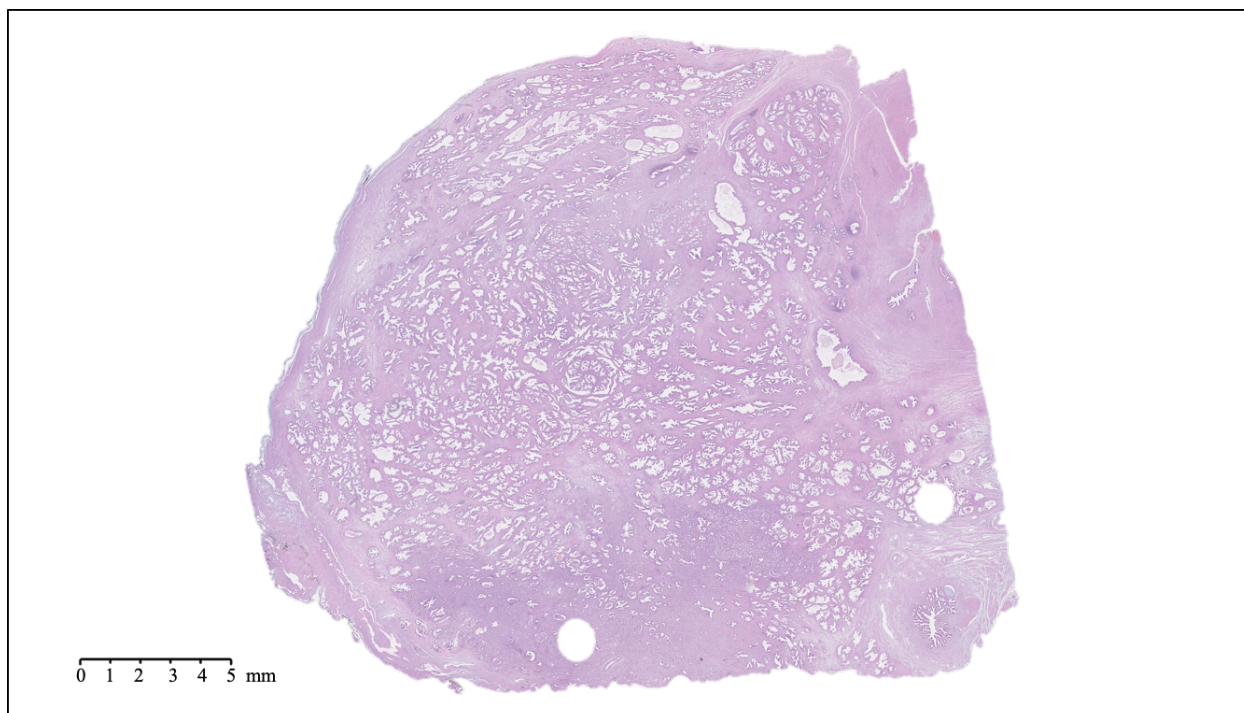

**Supplementary Figure 1: Hematoxylin and Eosin Stain of Prostate Cancer Tissue**

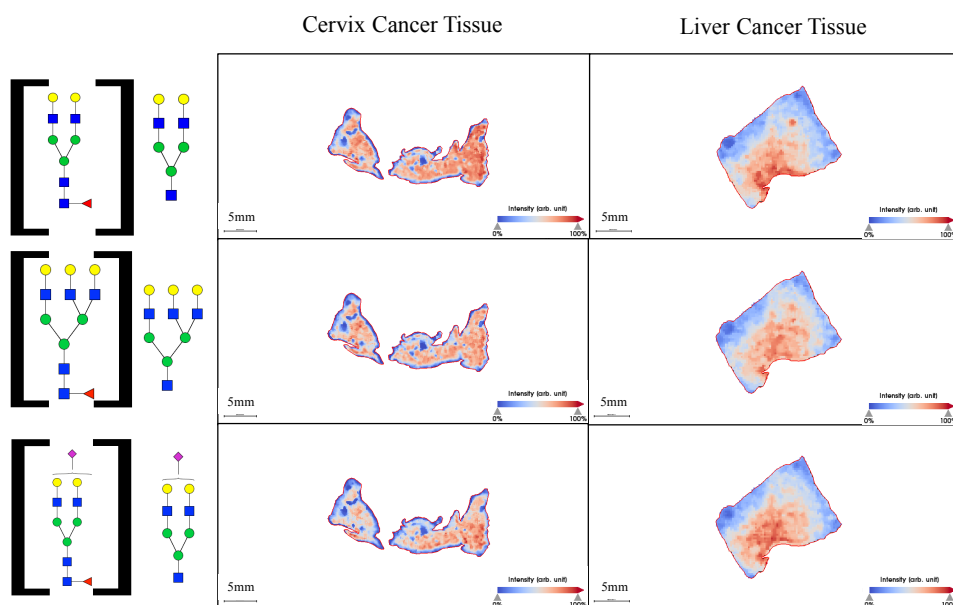

**Supplementary Figure 2: Multiple Tissue Types Treated with Endo F3.** Cervical cancer tissue as well as hepatocellular carcinoma tissue were treated with Endo F3 and analyzed for core fucosylated glycans shown to the left with the parent glycan structures shown in the brackets.

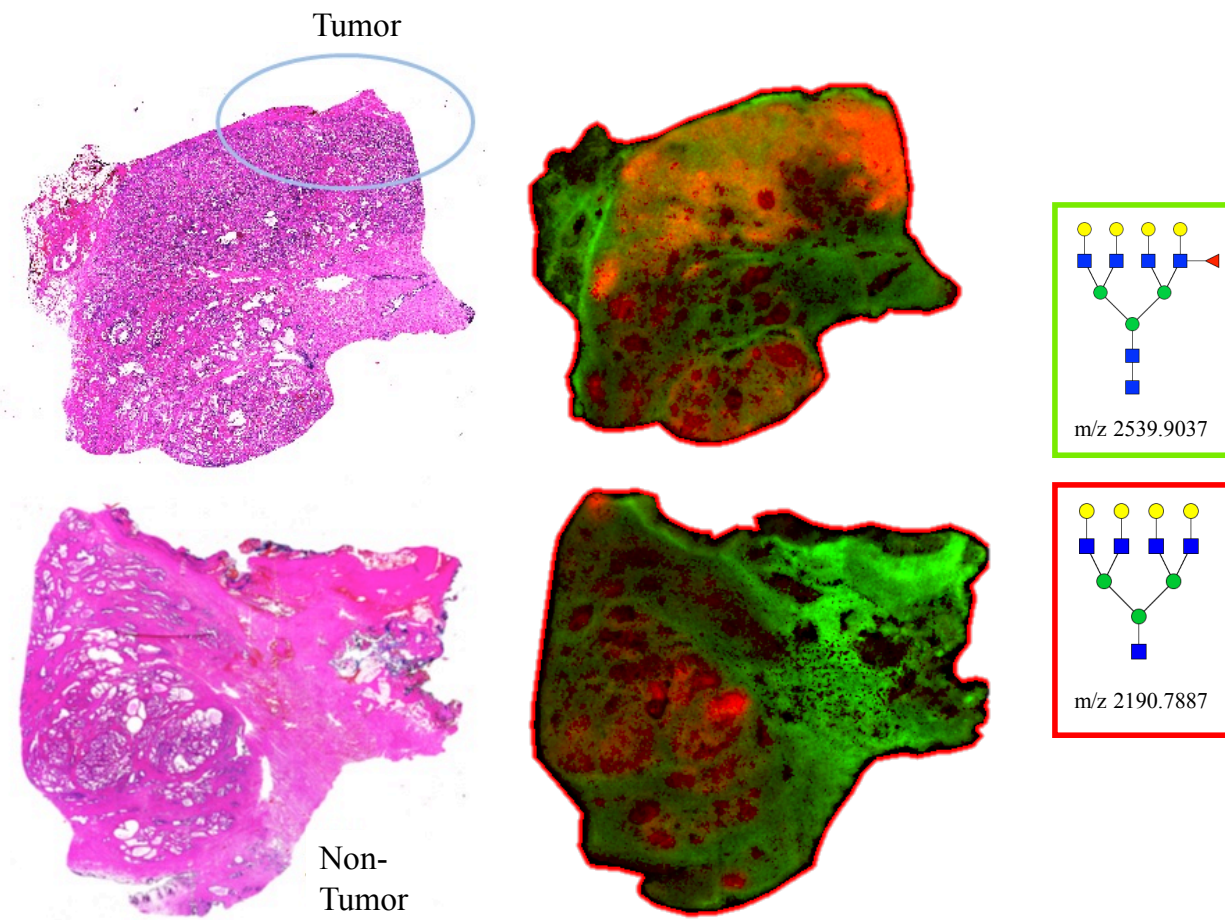

**Supplementary Figure 3: Mixture of PNGase F and Endo F3:** Representative images of Endo F3 and PNGase F mixed at an approximate ratio of 1:20 respectively (middle). Hemotoxylin and eosin stain included (left), as well as structure and m/z (right) for distribution of the green N-glycan (m/z 2539.9037) and red N-glycan (m/z 2190.7887)

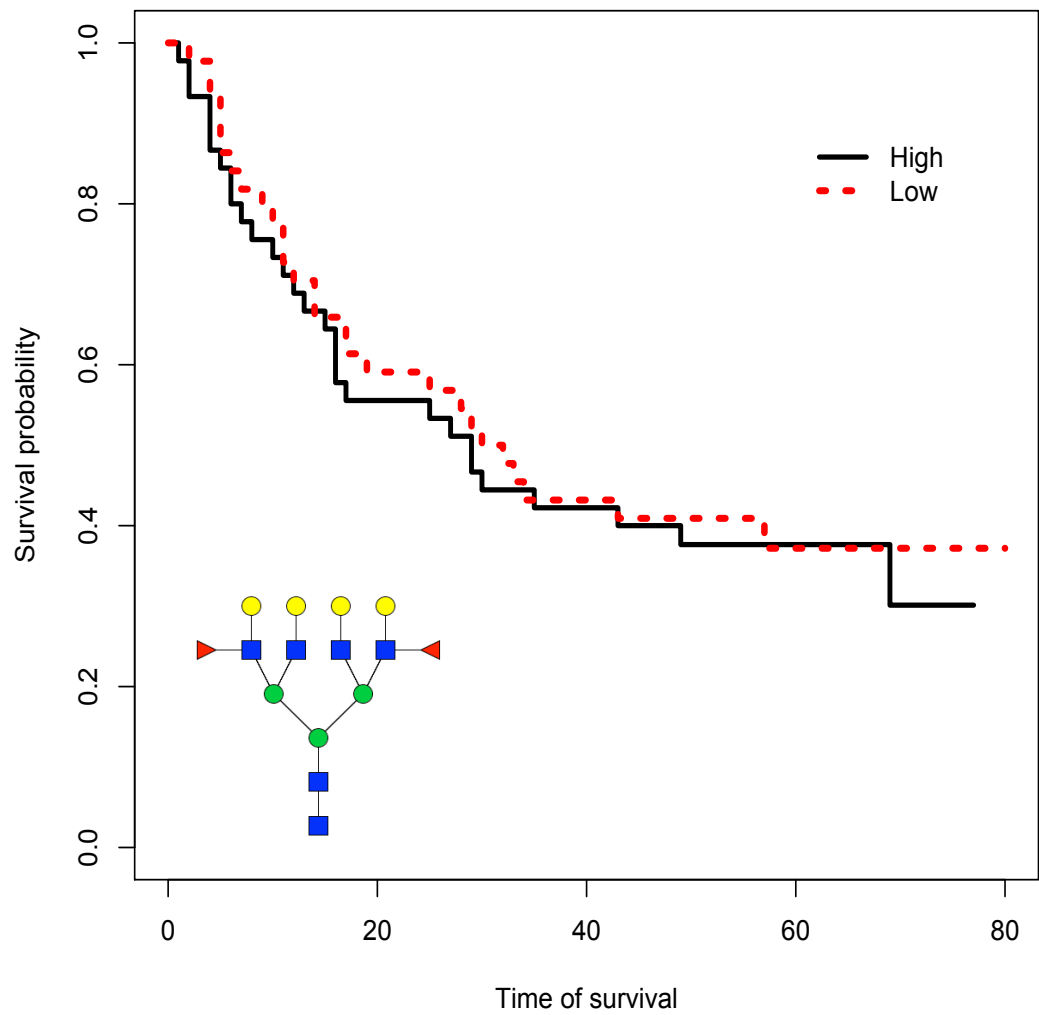

**Supplementary Figure 4: Survival Probability for Non-Core Fucosylated N-Linked Glycan**

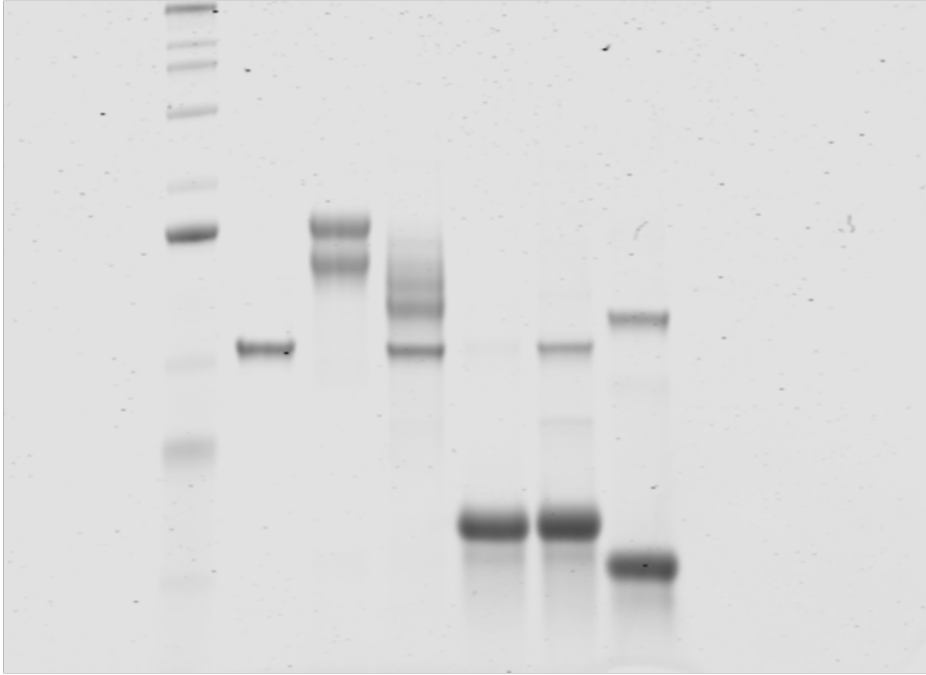

**Supplementary Figure 5: Full SDS-PAGE Gel Image from Figure 1**

**Supplementary Table 1: Master List of N-Linked Glycans with PNGase F.** Master list of all N-linked glycans found using PNGase F treatment, along with the corresponding mass error and compositional structure.

| Composition                  | Theoretical m/z | Observed m/z | Error in PPM |
|------------------------------|-----------------|--------------|--------------|
| Hex5HexNAc2 + 1Na            | 1257.4226       | 1257.4337    | 8.8443       |
| Hex6HexNAc2 + 1Na            | 1419.4754       | 1419.4974    | 15.5276      |
| Hex4dHex1HexNAc3 + 1Na       | 1444.5071       | 1444.5368    | 20.5544      |
| Hex3dHex1HexNAc4 + 1Na       | 1485.5337       | 1485.5605    | 18.0144      |
| Hex4HexNAc4 + 1Na            | 1501.5286       | 1501.5592    | 20.4065      |
| Hex7HexNAc2 + 1Na            | 1581.5282       | 1581.5788    | 31.9634      |
| Hex4dHex1HexNAc4 + 1Na       | 1647.5865       | 1647.6356    | 29.7714      |
| Hex5HexNAc4 + 1Na            | 1663.5814       | 1663.6206    | 23.5883      |
| Hex3dHex1HexNAc5 + 1Na       | 1688.6131       | 1688.6569    | 25.9154      |
| Hex4HexNAc5 + 1Na            | 1704.6080       | 1704.6473    | 23.0792      |
| Hex8HexNAc2 + 1Na            | 1743.5810       | 1743.6242    | 24.7944      |
| Hex5dHex1HexNAc4 + 1Na       | 1809.6393       | 1809.7042    | 35.8806      |
| Hex4dHex1HexNAc5 + 1Na       | 1850.6659       | 1850.7334    | 36.4955      |
| Hex9HexNAc2 + 1Na            | 1905.6338       | 1905.7078    | 38.8432      |
| Hex5HexNAc4NeuAc1 + 2Na      | 1976.6666       | 1976.7341    | 34.1848      |
| Hex5dHex1HexNAc5 + 1Na       | 2012.7187       | 2012.7656    | 23.3222      |
| Hex6HexNAc5 + 1Na            | 2028.7136       | 2028.7927    | 38.9661      |
| Hex5dHex1HexNAc4NeuAc1 + 2Na | 2122.7245       | 2122.7869    | 29.3924      |
| Hex5dHex2HexNAc5 + 1Na       | 2158.7766       | 2158.8272    | 23.4304      |
| Hex6dHex1HexNAc5 + 1Na       | 2174.7715       | 2174.8578    | 39.6828      |
| Hex4dHex2HexNAc5NeuAc1 + 1Na | 2287.8192       | 2287.8214    | 0.9577       |
| Hex6HexNAc5NeuAc1 + 1Na      | 2319.8090       | 2319.8982    | 38.4562      |
| Hex6dHex2HexNAc5 + 1Na       | 2320.8294       | 2320.9157    | 37.2026      |
| Hex6HexNAc5NeuAc1 + 2Na      | 2341.7988       | 2341.8272    | 12.1240      |
| Hex6dHex1HexNAc6 + 1Na       | 2377.8509       | 2377.8963    | 19.0975      |
| Hex7HexNAc6 + 1Na            | 2393.8458       | 2393.9259    | 33.4779      |
| Hex9HexNAc3NeuAc1 + 2Na      | 2421.7984       | 2421.9534    | 64.0235      |
| Hex6dHex3HexNAc5 + 1Na       | 2466.8873       | 2466.9264    | 15.8422      |
| Hex6dHex1HexNAc5NeuAc1 + 2Na | 2487.8567       | 2487.9189    | 25.0022      |
| Hex7dHex1HexNAc6 + 1Na       | 2539.9037       | 2539.9544    | 19.9736      |
| Hex7dHex2HexNAc6 + 1Na       | 2685.9616       | 2685.9904    | 10.7265      |
| Hex8HexNAc7 + 1Na            | 2758.9780       | 2759.0200    | 15.2230      |
| Hex6dHex3HexNAc5NeuAc1 + 2Na | 2779.9725       | 2779.9808    | 3.0043       |
| Hex7dHex3HexNAc6 + 1Na       | 2832.0195       | 2832.0103    | 3.2376       |
| Hex8dHex1HexNAc7 + 1Na       | 2905.0359       | 2905.0798    | 15.1017      |

**Supplementary Table 2: Master List of N-Linked Glycans with Endo F3.** Master list of all N-linked glycans found using Endo F3 treatment, along with the corresponding mass error and compositional structure.

| Composition                  | Parent m/z | Endo F3 Theoretical m/z | Observed m/z | Error in PPM |
|------------------------------|------------|-------------------------|--------------|--------------|
| Hex4HexNAc3 + 1Na            | 1647.5865  | 1298.4495               | 1298.4477    | 1.4086       |
| Hex3HexNAc4 + 1Na            | 1688.6131  | 1339.4761               | 1339.4328    | 32.2955      |
| Hex4dHex1HexNAc3 + 1Na       | 1793.6444  | 1444.5074               | 1444.5008    | 4.5891       |
| Hex5HexNAc3 + 1Na            | 1809.6393  | 1460.5023               | 1460.5117    | 6.4505       |
| Hex3dHex1HexNAc4 + 1Na       | 1834.6710  | 1485.5340               | 1485.4574    | 51.5565      |
| Hex4HexNAc4 + 1Na            | 1850.6659  | 1501.5289               | 1501.5338    | 3.2906       |
| Hex3HexNAc5 + 1Na            | 1891.6925  | 1542.5555               | 1542.5491    | 4.1678       |
| Hex4dHex1HexNAc4 + 1Na       | 1996.7238  | 1647.5868               | 1647.5796    | 4.3694       |
| Hex5HexNAc4 + 1Na            | 2012.7187  | 1663.5817               | 1663.6029    | 12.7262      |
| Hex4HexNAc5 + 1Na            | 2053.7453  | 1704.6083               | 1704.5639    | 26.0758      |
| Hex5HexNAc3NeuAc1 + 1Na      | 2100.7347  | 1751.5977               | 1751.5814    | 9.2995       |
| Hex5dHex1HexNAc4 + 1Na       | 2158.7766  | 1809.6396               | 1809.6271    | 6.9180       |
| Hex6HexNAc4 + 1Na            | 2174.7715  | 1825.6345               | 1825.6245    | 5.4660       |
| Hex5dHex2HexNAc4 + 1Na       | 2304.8345  | 1955.6975               | 1955.6420    | 28.3935      |
| Hex6dHex1HexNAc4 + 1Na       | 2320.8294  | 1971.6924               | 1971.6772    | 7.6934       |
| Hex5HexNAc4NeuAc1 + 2Na      | 2325.8039  | 1976.6669               | 1976.6640    | 1.4408       |
| Hex5dHex1HexNAc5 + 1Na       | 2361.8560  | 2012.7190               | 2012.7185    | 0.2579       |
| Hex6HexNAc5 + 1Na            | 2377.8509  | 2028.7139               | 2028.7039    | 4.9386       |
| Hex5HexNAc3NeuAc2 + 1Na      | 2391.8301  | 2042.6931               | 2042.6896    | 1.7178       |
| Hex5HexNAc3NeuAc2 + 2Na      | 2413.8199  | 2064.6829               | 2064.6713    | 5.5883       |
| Hex6HexNAc4NeuAc1 + 1Na      | 2465.8669  | 2116.7299               | 2116.7179    | 5.6875       |
| Hex6HexNAc4NeuAc1 + 2Na      | 2487.8567  | 2138.7197               | 2138.7127    | 3.2580       |
| Hex5HexNAc5NeuAc1 + 1Na      | 2506.8935  | 2157.7565               | 2157.7176    | 18.0368      |
| Hex6dHex1HexNAc5 + 1Na       | 2523.9088  | 2174.7718               | 2174.7546    | 7.8900       |
| Hex7HexNAc5 + 1Na            | 2539.9037  | 2190.7667               | 2190.8064    | 18.1128      |
| Hex6dHex2HexNAc5 + 1Na       | 2669.9667  | 2320.8297               | 2320.8643    | 14.9046      |
| Hex7dHex1HexNAc5 + 1Na       | 2685.9616  | 2336.8246               | 2336.7482    | 32.6850      |
| Hex6HexNAc5NeuAc1 + 2Na      | 2690.9361  | 2341.7991               | 2341.8213    | 9.4936       |
| Hex7HexNAc5 + 1Na            | 2742.9831  | 2393.8461               | 2393.8870    | 17.0942      |
| Hex6dHex1HexNAc5NeuAc1 + 1Na | 2815.0042  | 2465.8672               | 2465.8742    | 2.8392       |
| Hex7dHex2HexNAc5 + 1Na       | 2832.0195  | 2482.8825               | 2482.8719    | 4.2729       |
| Hex7dHex1HexNAc6 + 1Na       | 2889.0410  | 2539.9040               | 2539.9865    | 32.4937      |
| Hex8HexNAc6 + 1Na            | 2905.0359  | 2555.8989               | 2555.9095    | 4.1516       |
| Hex7dHex2HexNAc6 + 1Na       | 3035.0989  | 2685.9619               | 2685.9424    | 7.2745       |
| Hex7dHex1HexNAc6NeuAc1 + 1Na | 3180.1364  | 2830.9994               | 2831.1097    | 38.9442      |
| Hex7dHex1HexNAc6NeuAc1 + 2Na | 3202.1262  | 2852.9892               | 2853.0869    | 34.2560      |
| Hex9HexNAc7 + 1Na            | 3270.1681  | 2921.0311               | 2921.1289    | 33.4885      |
